# Supplementary material for: Detection of quantitative trait loci for mungbean yellow mosaic India virus (MYMIV) resistance in mungbean (Vigna radiata (L.) Wilczek) in India and Pakistan
Source: PubMed Central journal article supplement — Breed Sci. 2013 Dec 1;63(4):367–73. doi: 10.1270/jsbbs.63.367 (PMC3859347; doi:10.1270/jsbbs.63.367), 2013-12-01
Supplement: 63_367_s1.pdf [file 63_367_s1.pdf]

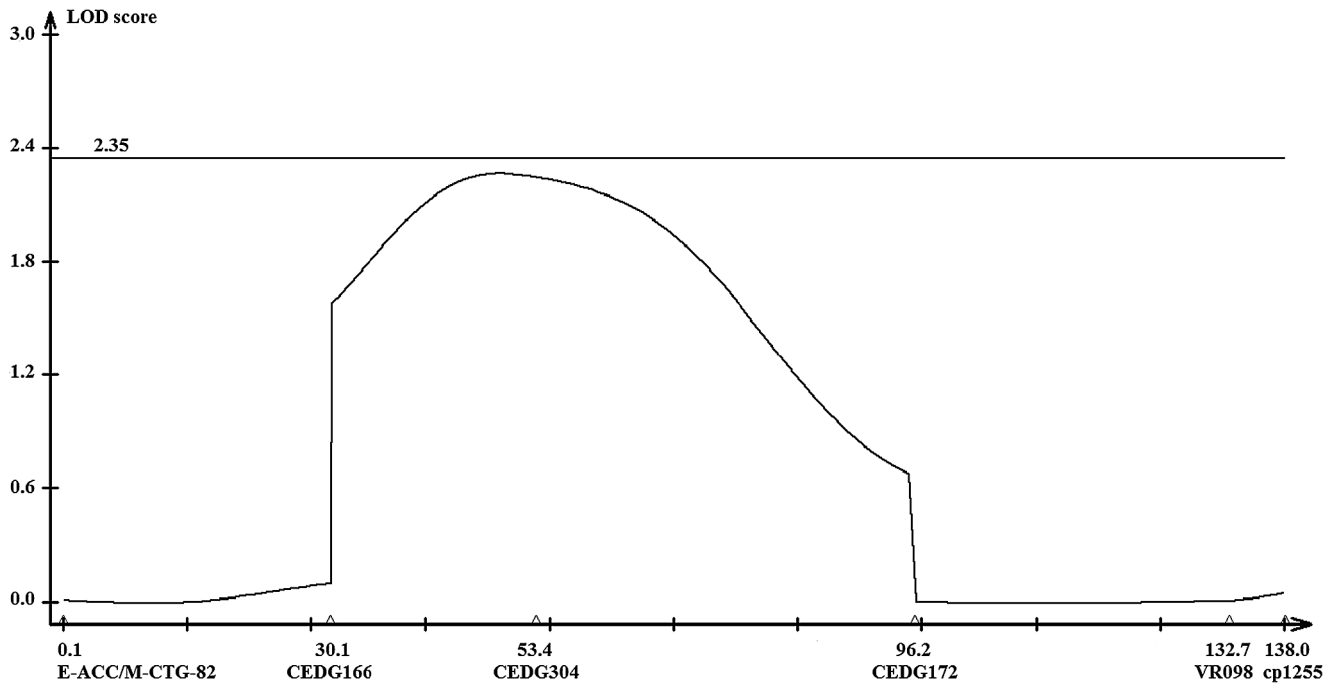

**Supplemental Fig. 1.** LOD score plot on linkage group 9A for MYMIV resistance in Pakistan detected by composite interval mapping.
