# Supplementary material for: Detection of quantitative trait loci for mungbean yellow mosaic India virus (MYMIV) resistance in mungbean (Vigna radiata (L.) Wilczek) in India and Pakistan
Source: PubMed Central journal article supplement — Breed Sci. 2013 Dec 1;63(4):367–73. doi: 10.1270/jsbbs.63.367 (PMC3859347; doi:10.1270/jsbbs.63.367), 2013-12-01
Supplement: 63_367_s2.pdf [file 63_367_s2.pdf]

Supplemental Table 1. Disease scores in the mungbean RIL population derived from the cross KPS2×NM10-12-1 evaluated for resistance to mungbean yellow mosaic India virus in 2012 at Punjab, India, and percentages of disease index in 2008 in the same population evaluated for the resistance at Faisalabad, Pakistan.

| Entry     | Disease score<br>(evaluation in India) | Percentages of disease index<br>(evaluation in Pakistan) |
|-----------|----------------------------------------|----------------------------------------------------------|
| KPS2      | 5.00                                   | 80.80                                                    |
| NM10-12-1 | 1.17                                   | 23.64                                                    |
| RIL1      | 4.91                                   | 79.31                                                    |
| RIL2      | 4.47                                   | 77.14                                                    |
| RIL3      | -                                      | 78.00                                                    |
| RIL4      | 4.86                                   | 77.42                                                    |
| RIL5      | 1.95                                   | 76.88                                                    |
| RIL6      | 5.00                                   | 98.00                                                    |
| RIL7      | 3.25                                   | 86.90                                                    |
| RIL8      | 1.96                                   | 67.86                                                    |
| RIL9      | 4.43                                   | 67.05                                                    |
| RIL10     | 1.93                                   | 62.35                                                    |
| RIL11     | 1.17                                   | 64.00                                                    |
| RIL12     | 4.42                                   | 84.62                                                    |
| RIL13     | 4.55                                   | 92.38                                                    |
| RIL14     | 4.96                                   | 63.33                                                    |
| RIL15     | 4.54                                   | 82.35                                                    |
| RIL16     | 1.35                                   | 73.33                                                    |
| RIL17     | 4.74                                   | 89.66                                                    |
| RIL18     | 3.96                                   | 91.52                                                    |
| RIL19     | 1.09                                   | 80.63                                                    |
| RIL20     | 4.67                                   | 78.75                                                    |
| RIL21     | 4.57                                   | 60.00                                                    |
| RIL22     | 4.29                                   | 82.96                                                    |
| RIL23     | 4.70                                   | 80.00                                                    |

|       |      |       |
|-------|------|-------|
| RIL24 | 2.31 | 78.62 |
| RIL25 | 4.80 | 80.77 |
| RIL26 | 2.10 | 60.00 |
| RIL27 | 1.97 | 60.77 |
| RIL28 | 2.38 | 50.82 |
| RIL29 | 5.00 | 70.00 |
| RIL30 | 2.93 | 31.89 |
| RIL31 | 5.00 | 87.74 |
| RIL32 | 2.25 | 74.48 |
| RIL33 | 4.23 | 74.62 |
| RIL34 | 5.00 | 80.00 |
| RIL35 | 1.74 | 59.38 |
| RIL36 | 1.92 | 52.67 |
| RIL37 | 5.00 | 85.19 |
| RIL38 | -    | 59.05 |
| RIL39 | 4.19 | 58.50 |
| RIL40 | 4.25 | 83.08 |
| RIL41 | 4.66 | 84.29 |
| RIL42 | 1.78 | 65.88 |
| RIL43 | 4.75 | 84.67 |
| RIL44 | -    | 82.50 |
| RIL45 | 2.32 | 72.00 |
| RIL46 | 0.71 | 73.51 |
| RIL47 | 5.00 | 76.67 |
| RIL48 | 1.85 | 60.00 |
| RIL49 | 4.82 | 90.91 |
| RIL50 | -    | 90.63 |
| RIL51 | 2.25 | 90.44 |
| RIL52 | 4.93 | 90.35 |
| RIL53 | 3.94 | 91.18 |
| RIL54 | 5.00 | 88.57 |
| RIL55 | 4.14 | 65.14 |
| RIL56 | -    | 64.14 |

|       |      |       |
|-------|------|-------|
| RIL57 | 4.04 | 65.52 |
| RIL58 | 2.46 | 67.41 |
| RIL59 | -    | 81.18 |
| RIL60 | 3.97 | 81.08 |
| RIL61 | 4.64 | 81.62 |
| RIL62 | -    | 70.00 |
| RIL63 | -    | 78.79 |
| RIL64 | 4.22 | 72.31 |
| RIL65 | 3.50 | 75.20 |
| RIL66 | 4.35 | 63.45 |
| RIL67 | 3.76 | 80.00 |
| RIL68 | 4.79 | 61.94 |
| RIL69 | 4.23 | 81.05 |
| RIL70 | 4.69 | 82.33 |
| RIL71 | 2.89 | 61.03 |
| RIL72 | 4.20 | 58.46 |
| RIL73 | 5.00 | 83.81 |
| RIL74 | 2.25 | 77.78 |
| RIL75 | 2.29 | 76.15 |
| RIL76 | 2.51 | 68.13 |
| RIL77 | 3.92 | 87.50 |
| RIL78 | 1.18 | 82.40 |
| RIL79 | 3.69 | 82.22 |
| RIL80 | 2.13 | 65.00 |
| RIL81 | 4.89 | 60.83 |
| RIL82 | 4.74 | 58.46 |
| RIL83 | -    | 65.39 |
| RIL84 | 3.06 | 64.62 |
| RIL85 | 3.72 | 66.67 |
| RIL86 | 3.80 | 64.55 |
| RIL87 | 3.98 | 69.52 |
| RIL88 | 4.35 | 81.29 |
| RIL89 | 3.40 | 61.91 |

|        |      |        |
|--------|------|--------|
| RIL90  | 3.98 | 65.81  |
| RIL91  | 2.77 | 78.38  |
| RIL92  | 4.37 | 80.00  |
| RIL93  | 3.60 | 64.29  |
| RIL94  | 4.90 | 82.22  |
| RIL95  | 4.00 | 81.60  |
| RIL96  | 3.93 | 65.00  |
| RIL97  | 4.75 | 75.39  |
| RIL98  | 4.16 | 84.62  |
| RIL99  | 5.00 | 83.08  |
| RIL100 | 3.65 | 40.00  |
| RIL101 | 3.55 | 39.26  |
| RIL102 | 3.66 | 50.00  |
| RIL103 | -    | 56.57  |
| RIL104 | 5.00 | 85.00  |
| RIL105 | 4.28 | 83.03  |
| RIL106 | 5.00 | 87.62  |
| RIL107 | 4.38 | 73.53  |
| RIL108 | 2.13 | 72.31  |
| RIL109 | 4.30 | 75.17  |
| RIL110 | 3.32 | 70.71  |
| RIL111 | 4.16 | 85.71  |
| RIL112 | 3.89 | 75.71  |
| RIL113 | 3.51 | 71.61  |
| RIL114 | 5.00 | 100.00 |
| RIL115 | 3.20 | 68.70  |
| RIL116 | 3.92 | 76.15  |
| RIL117 | 1.91 | 73.79  |
| RIL118 | 3.77 | 75.46  |
| RIL119 | 5.00 | 76.80  |
| RIL120 | -    | 83.33  |
| RIL121 | 4.42 | 84.52  |
| RIL122 | 4.82 | 85.19  |

---

- = missing data due to no germination.
